# Supplementary material for: Chromone-Containing Allylmorpholines Influence Ion Channels in Lipid Membranes via Dipole Potential and Packing Stress
Source: MDPI journal article supplement (doi:10.3390/ijms231911554), 2022-09-30
Supplement: s1 [file s1]

## Supplementary Material

### 1.1 Supplementary Figures

**Supplementary Figure S1.** Dependence of the decrease in the boundary potential of the membrane ( $-\Delta\phi_b$ ) on the concentration of chromone-containing allylmorpholines. The relation between the color of symbol and the compound is given on the figure legend. The membranes were composed of POPC and bathed in 0.1 M KCl at pH 7.4.  $V = 50$  mV.

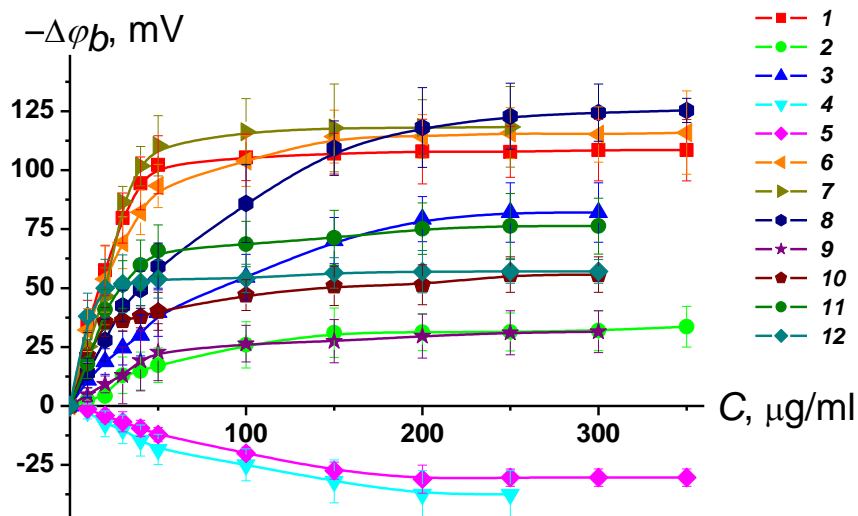

**Supplementary Figure S2.** Deconvolution analysis of the main transition peak of DPPC in the presence of 100 (*left panel*) and 250  $\mu\text{g/ml}$  (*right panel*) of chromone-containing allylmorpholines. The parameters characterizing the individual components are summarized in Supplementary Table 2.

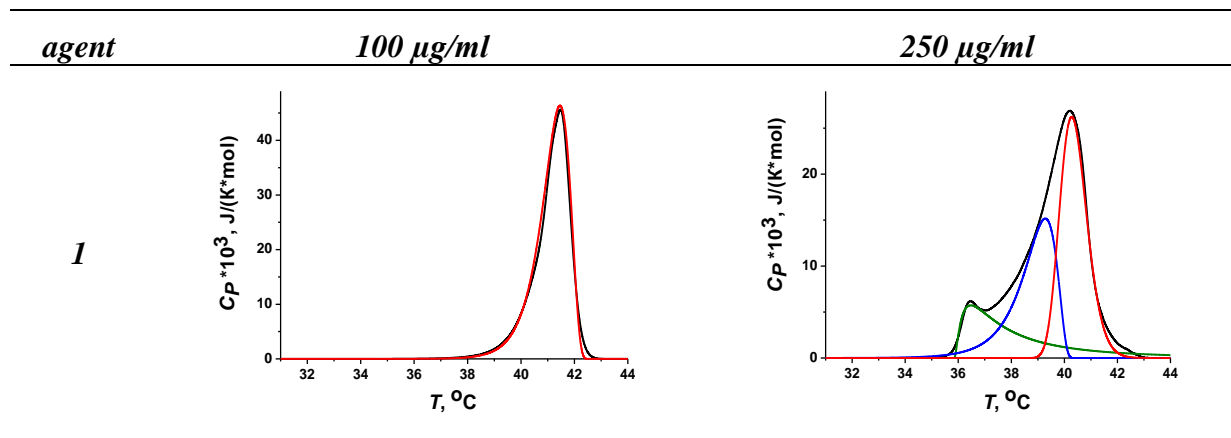

2

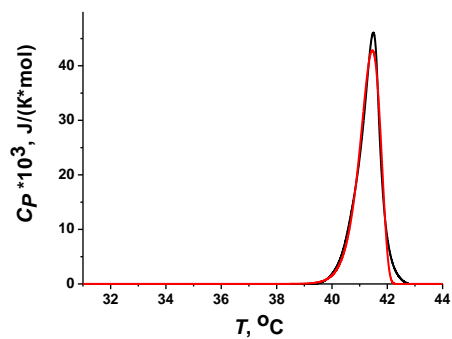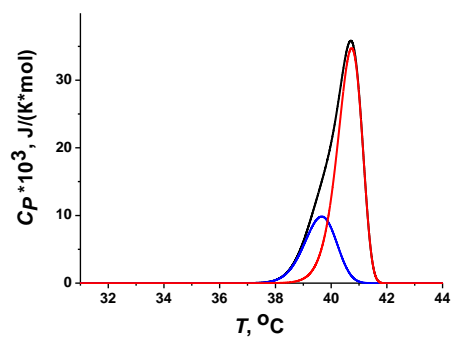

3

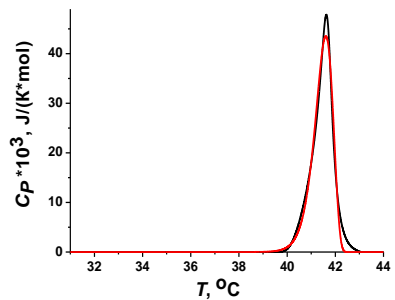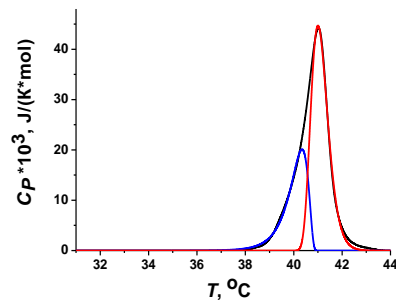

4

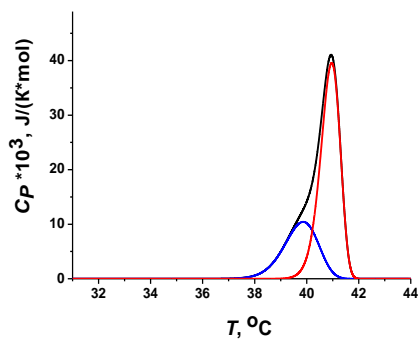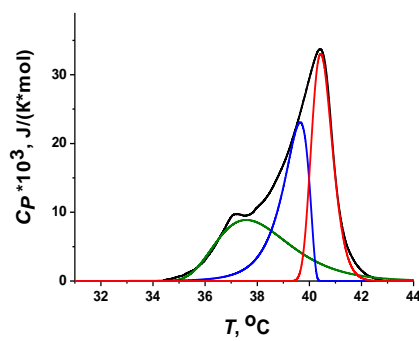

5

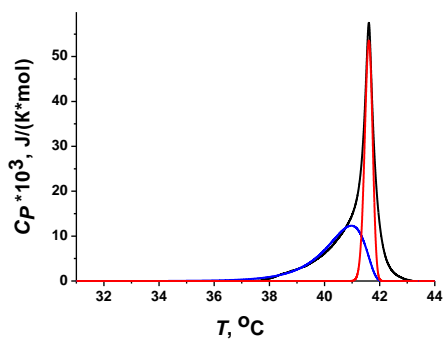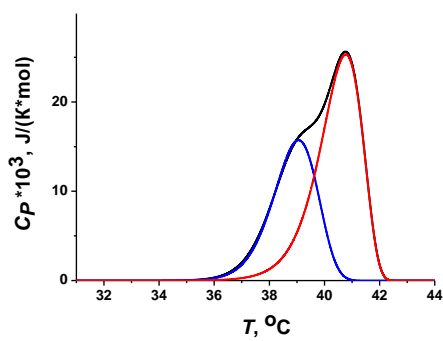

6

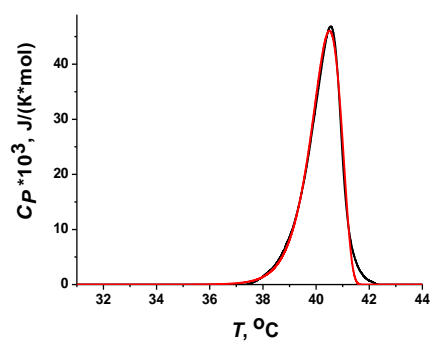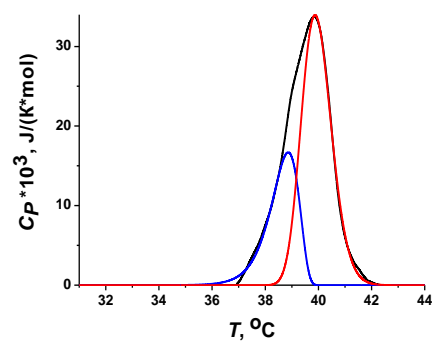

7

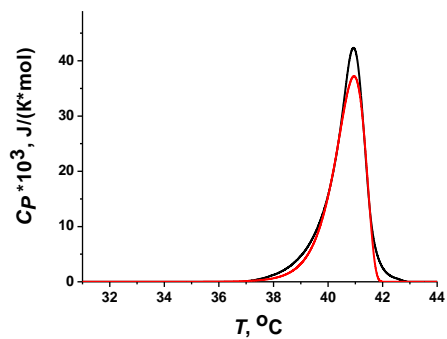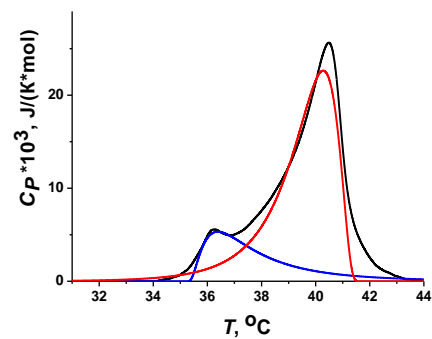

8

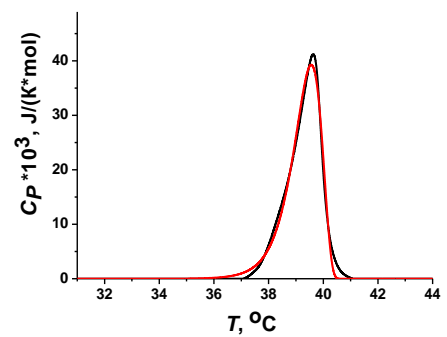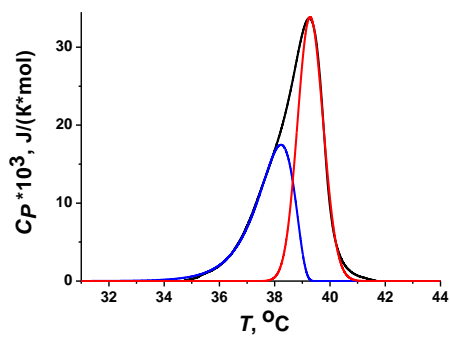

9

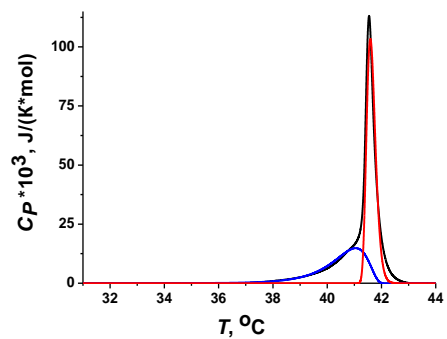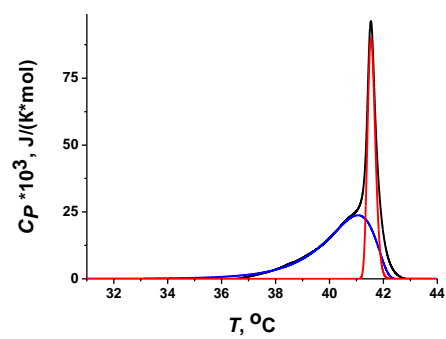

10

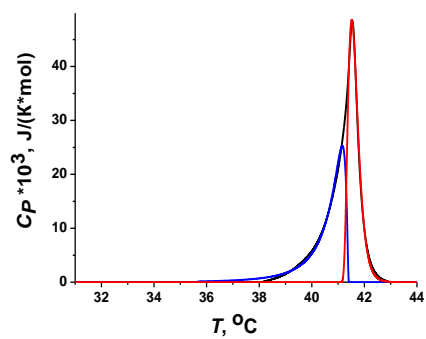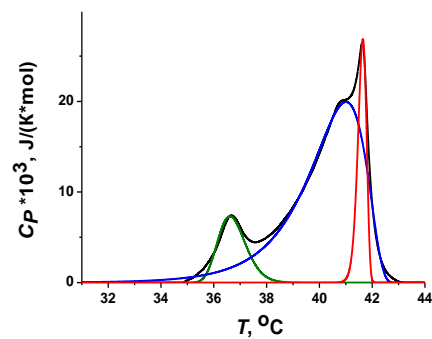

11

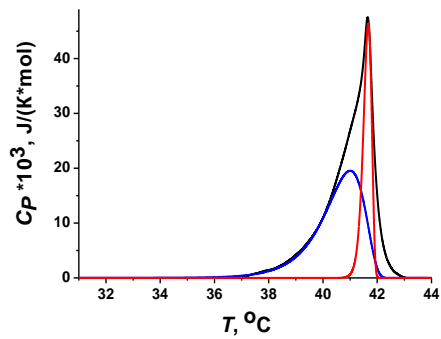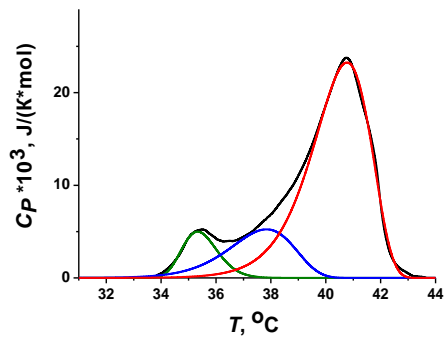

12

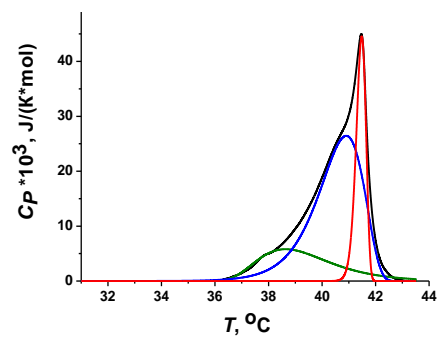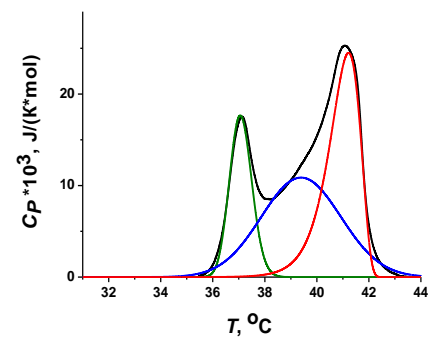

**Supplementary Figure S3.** Reversibility of heating thermograms of DPPC liposomes in the absence (*black lines*) and presence of 100 (*red lines*) and 250  $\mu\text{g/ml}$  (*green lines*) of chromone-containing allylmorpholines. Data of heating steps of two repetitive scans are presented.

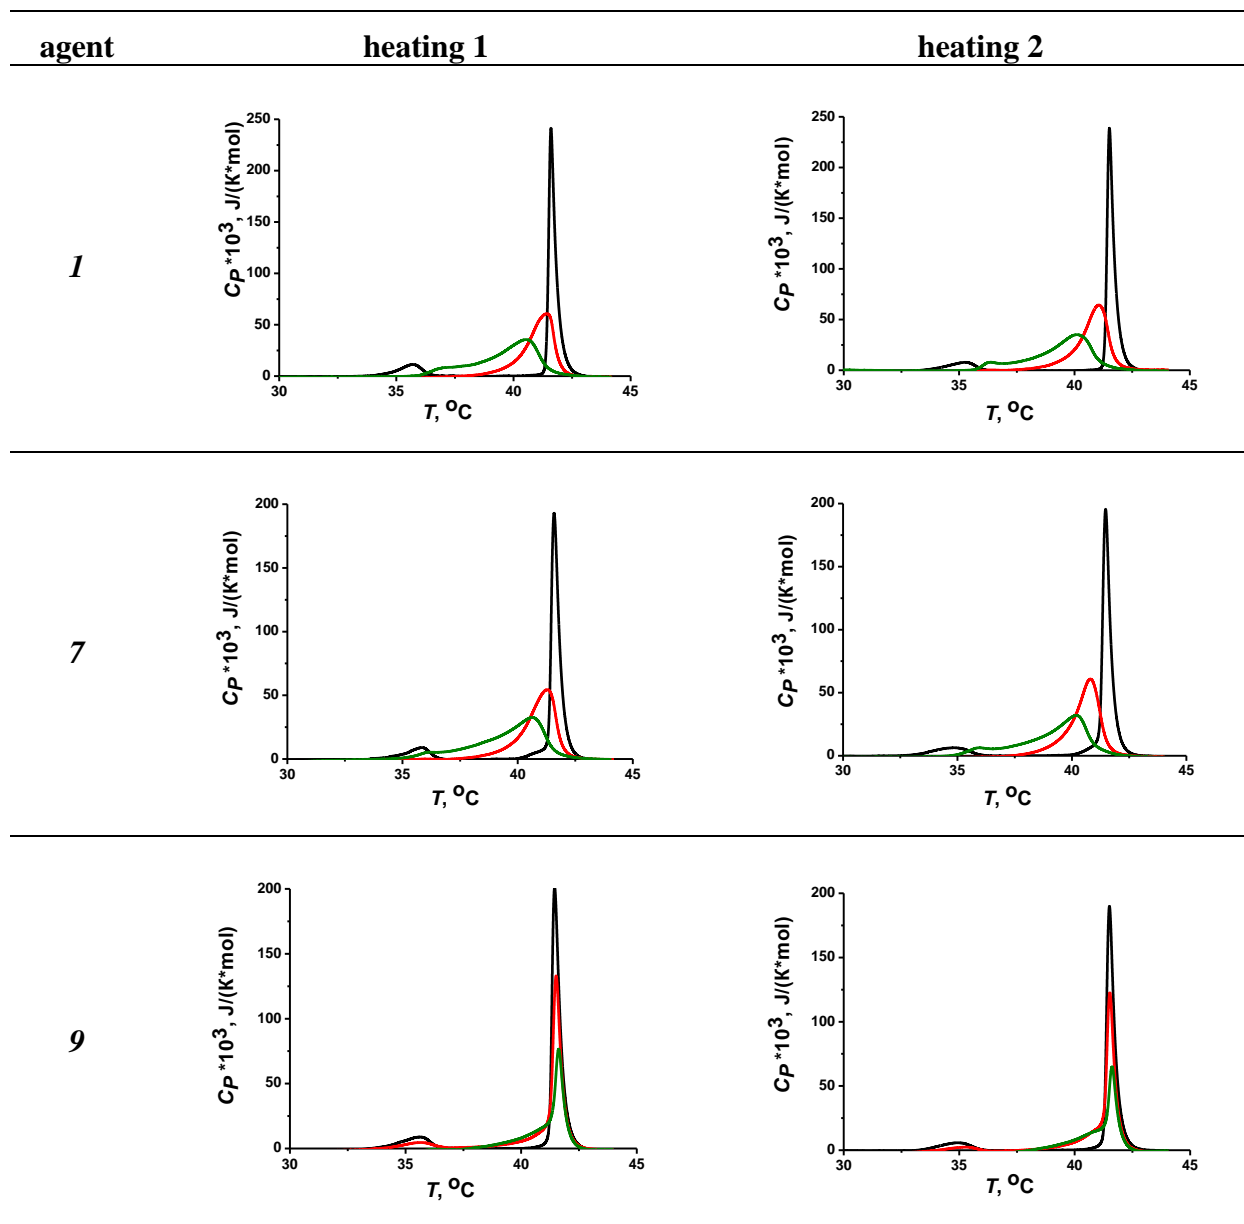

**Supplementary Figure S4.** The thermograms of lamellar-to-inverted hexagonal phase transition of POPE in the absence (*black line*) and presence derivative **7** at 100  $\mu\text{g/ml}$  (*red line*).

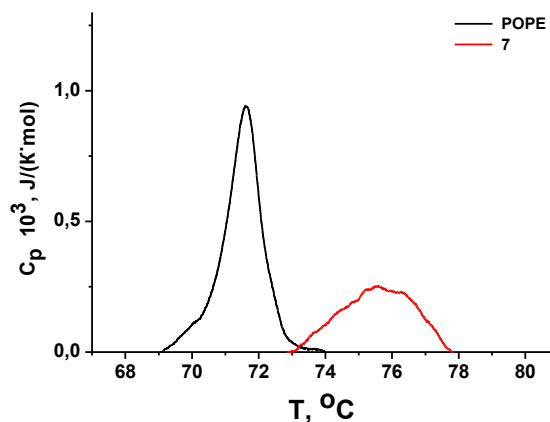

**Supplementary Figure S5.** The effects of chromone-containing allylmorpholines (**1**, **2**, **3**, **5**, **9**, **10**, **11**, and **12**) on the steady-state transmembrane current flowing through membranes modified by one-side addition of AmB. The moments of the addition of 100  $\mu\text{g/ml}$  of **1**, **2**, **3**, **5**, **9**, **10**, **11**, and **12** to the bilayer bathing solution are indicated by arrows. The lipid bilayers were composed of POPC/CHOL (80/20 mol%) and bathed in 2.0 M KCl, pH 7.4.  $V = 50$  mV.

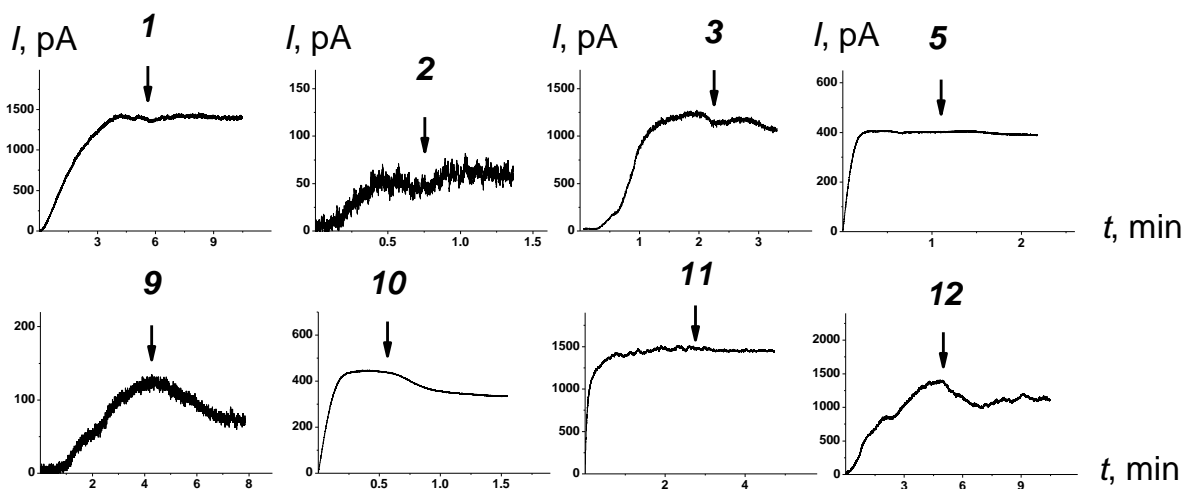

**Supplementary Figure S6.** The effects of allymorpholines **1** (A) and **7** (B) on lipid bilayers composed of POPC and bathed in 0.1 M KCl pH 7.4. The transmembrane voltage was 100 mV. Arrows indicate the moments of addition of chromone-containing allymorpholines to the membrane bathing solution.

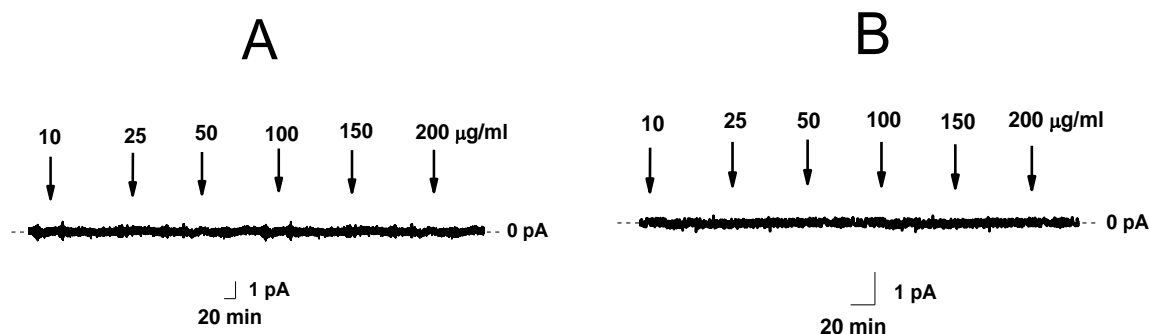

## 1.2 Supplementary Tables

**Supplementary Table S1.** The characteristics of tested chromone-containing allymorpholine molecules.

| <i>agent</i> | <i>number in</i><br>(Chernov et al., 2018) | <i>molecular weight</i> | <i>pKa</i> <sup>#</sup> | <i>logP</i> <sup>#</sup> | <i>μ</i> <sup>#</sup> , D |
|--------------|--------------------------------------------|-------------------------|-------------------------|--------------------------|---------------------------|
| <b>1</b>     | 9e                                         | 428.75                  | 6.21                    | 3.53                     | 4.21                      |
| <b>2</b>     | 9b                                         | 349.85                  | 6.21                    | 2.52                     | 3.98                      |
| <b>3</b>     | 9f                                         | 367.84                  | 6.21                    | 2.81                     | 4.56                      |
| <b>4</b>     | 9j                                         | 442.77                  | 6.21                    | 3.15                     | 2.82                      |
| <b>5</b>     | 33b                                        | 428.84                  | 6.42                    | 4.90                     | 2.94                      |
| <b>6</b>     | 9g                                         | 394.85                  | 6.21                    | 2.70                     | 8.87                      |
| <b>7</b>     | 9a                                         | 384.3                   | 6.21                    | 3.07                     | 4.39                      |
| <b>8</b>     | 25a                                        | 370.27                  | 6.30                    | 2.72                     | 5.62                      |
| <b>9</b>     | 34a                                        | 468.46                  | 6.27                    | 6.14                     | 4.73                      |
| <b>10</b>    | 33a                                        | 424.36                  | 6.42                    | 4.55                     | 4.71                      |
| <b>11</b>    | 30a                                        | 412.35                  | 6.28                    | 4.32                     | 4.29                      |
| <b>12</b>    | 31a                                        | 412.35                  | 6.28                    | 4.13                     | 4.55                      |

<sup>#</sup> the values of *pKa* (the ionization constants), *LogP* (logarithms of the octanol/water partition coefficients), and *μ* (dipole moments) are predicted by MolGpKa, ACD/ChemSketch, and ORCA Software at PM6 level respectively (ACD/ChemSketch <http://www.acdlabs.com>).

**Supplementary Table S2.** The main peak decomposition/deconvolution analysis in the presence of chromone-containing allylmorpholines.

| <i>agent</i> | <i>peak</i> | $T_{m\_i}$ , °C |           | $\frac{\Delta H_i/\Delta H_{cal}}{\sum_i \Delta H_i/\Delta H_{cal}}$ , % |           |
|--------------|-------------|-----------------|-----------|--------------------------------------------------------------------------|-----------|
|              |             | 100 µg/ml       | 250 µg/ml | 100 µg/ml                                                                | 250 µg/ml |
| <b>1</b>     | №1          | 41.5            | 40.3      | 100                                                                      | 57        |
|              | №2          | –               | 39.3      | –                                                                        | 32        |
|              | №3          | –               | 36.5      | –                                                                        | 11        |
| <b>2</b>     | №1          | 41.5            | 40.7      | 100                                                                      | 74        |
|              | №2          | –               | 39.7      | –                                                                        | 26        |
| <b>3</b>     | №1          | 41.5            | 41.0      | 100                                                                      | 78        |
|              | №2          | –               | 40.5      | –                                                                        | 22        |
| <b>4</b>     | №1          | 40.9            | 40.4      | 79                                                                       | 53        |
|              | №2          | 39.8            | 39.6      | 21                                                                       | 33        |
|              | №3          | –               | 37.2      | –                                                                        | 14        |
| <b>5</b>     | №1          | 41.5            | 40.8      | 76                                                                       | 71        |
|              | №2          | 40.9            | 38.9      | 24                                                                       | 29        |
| <b>6</b>     | №1          | 40.5            | 39.9      | 100                                                                      | 72        |
|              | №2          | –               | 38.8      | –                                                                        | 28        |
| <b>7</b>     | №1          | 41.0            | 40.2      | 100                                                                      | 84        |
|              | №2          | –               | 36.2      | –                                                                        | 16        |
| <b>8</b>     | №1          | 39.6            | 39.3      | 100                                                                      | 66        |
|              | №2          | –               | 38.2      | –                                                                        | 34        |
| <b>9</b>     | №1          | 41.5            | 41.5      | 86                                                                       | 82        |
|              | №2          | 41.0            | 41.0      | 14                                                                       | 18        |
| <b>10</b>    | №1          | 41.5            | 41.5      | 66                                                                       | 48        |
|              | №2          | 41.1            | 41.1      | 34                                                                       | 38        |
|              | №3          | –               | 36.7      | –                                                                        | 14        |
| <b>11</b>    | №1          | 41.5            | 40.7      | 59                                                                       | 72        |
|              | №2          | 41.3            | 37.6      | 41                                                                       | 14        |
|              | №3          | –               | 35.2      | –                                                                        | 14        |
| <b>12</b>    | №1          | 41.5            | 41.2      | 75                                                                       | 47        |
|              | №2          | 40.8            | 39.3      | 20                                                                       | 22        |
|              | №3          | 38.4            | 37.1      | 5                                                                        | 31        |

$T_m$  of pure DPPC is equal to 41.5 °C



**Supplementary Table S3.**  $T_m$ -hysteresis of DPPC in the presence of chromone-containing allylmorpholines<sup>#</sup>.

| <i>agent</i> | $\Delta T_h$ , °C |                  |
|--------------|-------------------|------------------|
|              | <i>100 µg/ml</i>  | <i>250 µg/ml</i> |
| <b>1</b>     | $0.5 \pm 0.1$     | $0.8 \pm 0.1$    |
| <b>2</b>     | $0.5 \pm 0.1$     | $0.8 \pm 0.1$    |
| <b>3</b>     | $0.4 \pm 0.1$     | $0.9 \pm 0.2$    |
| <b>4</b>     | $0.6 \pm 0.2$     | $0.8 \pm 0.2$    |
| <b>5</b>     | $0.5 \pm 0.1$     | $1.2 \pm 0.4$    |
| <b>6</b>     | $0.7 \pm 0.2$     | $0.8 \pm 0.1$    |
| <b>7</b>     | $0.7 \pm 0.1$     | $0.9 \pm 0.2$    |
| <b>8</b>     | $0.7 \pm 0.1$     | $0.9 \pm 0.2$    |
| <b>9</b>     | $0.3 \pm 0.1$     | $0.5 \pm 0.1$    |
| <b>10</b>    | $0.6 \pm 0.1$     | $0.9 \pm 0.2$    |
| <b>11</b>    | $0.6 \pm 0.1$     | $0.9 \pm 0.3$    |
| <b>12</b>    | $0.5 \pm 0.1$     | $1.2 \pm 0.2$    |

<sup>#</sup> $\Delta T_h$  of pure DPPC is equal to  $0.4 \pm 0.1$ .
